# Supplementary material for: Legionnaires’ Disease on the Rise in Switzerland: A Denominator-Based Analysis of National Diagnostic Data, 2007–2016
Source: MDPI journal article supplement (doi:10.3390/ijerph17197343), 2020-10-08
Supplement: s1 [file s1]

## Legionnaires' disease on the rise in Switzerland: A denominator-based analysis of national diagnostic data, 2007-2016

Fabienne B. Fischer<sup>1,2</sup>, Claudia Schmutz<sup>1,2</sup>, Valeria Gaia<sup>3</sup>, Daniel Mäusezahl<sup>1,2,\*</sup>

<sup>1</sup> Swiss Tropical and Public Health Institute, Basel, Switzerland

<sup>2</sup> University of Basel, Basel, Switzerland

<sup>3</sup> National Reference Center for Legionella, Service of microbiology, Ente Ospedaliero Cantonale, Bellinzona, Switzerland

\* Author for correspondence: Dr Daniel Mäusezahl; E-mail: [daniel.maeusezahl@unibas.ch](mailto:daniel.maeusezahl@unibas.ch); Tel.: +41 61 284 8178

### SUPPLEMENTARY MATERIAL: ADDITIONAL FIGURES

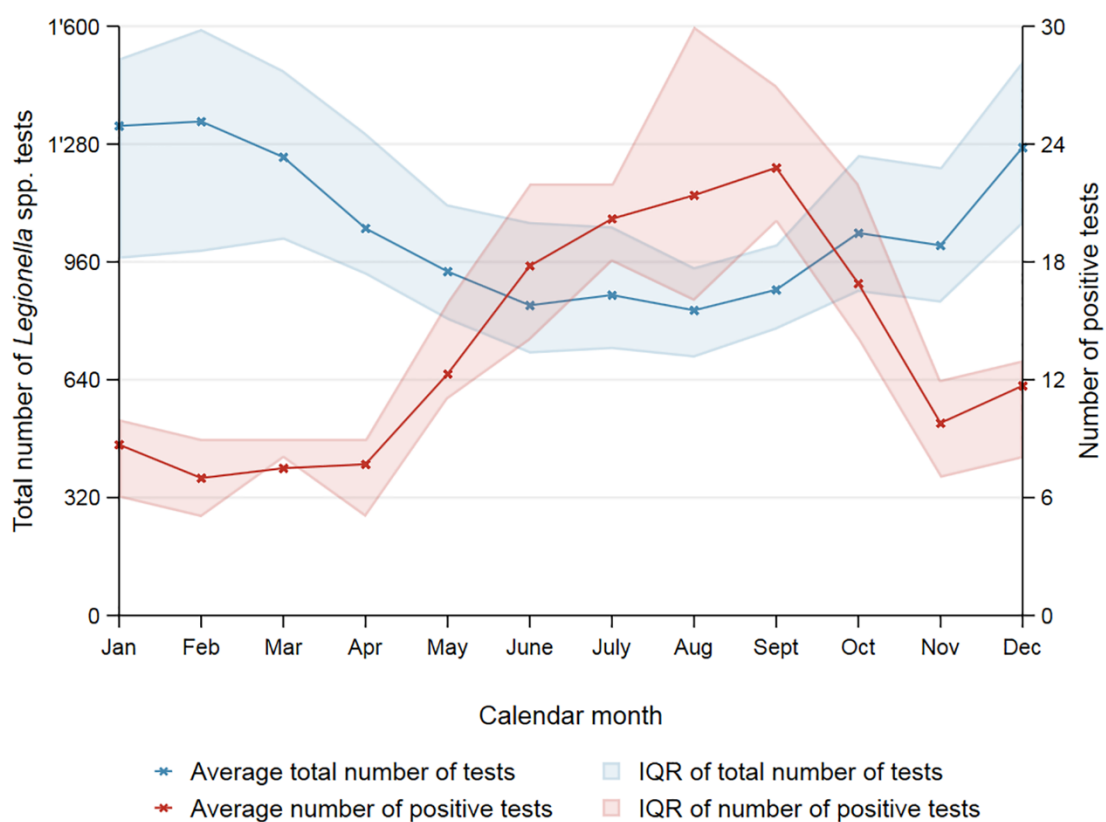

**Supplementary Figure 2** Seasonality in test volume and cases. The average and interquartile range (IQR) per calendar month of the total number of *Legionella* spp. tests and number of positive tests, Switzerland, 2007-2016. The seasonality has been incorporated into the mixed effect logistic regression using sine and cosine functions, in the form of  $\sin((d*2*\pi)/T)$  and  $\cos((d*2*\pi)/T)$ , where  $d$  is the time period (e.g. January, February) and  $T$  is the number of time periods (e.g. 12 months), as described by Stolwijk, A. M., et al. (1999).

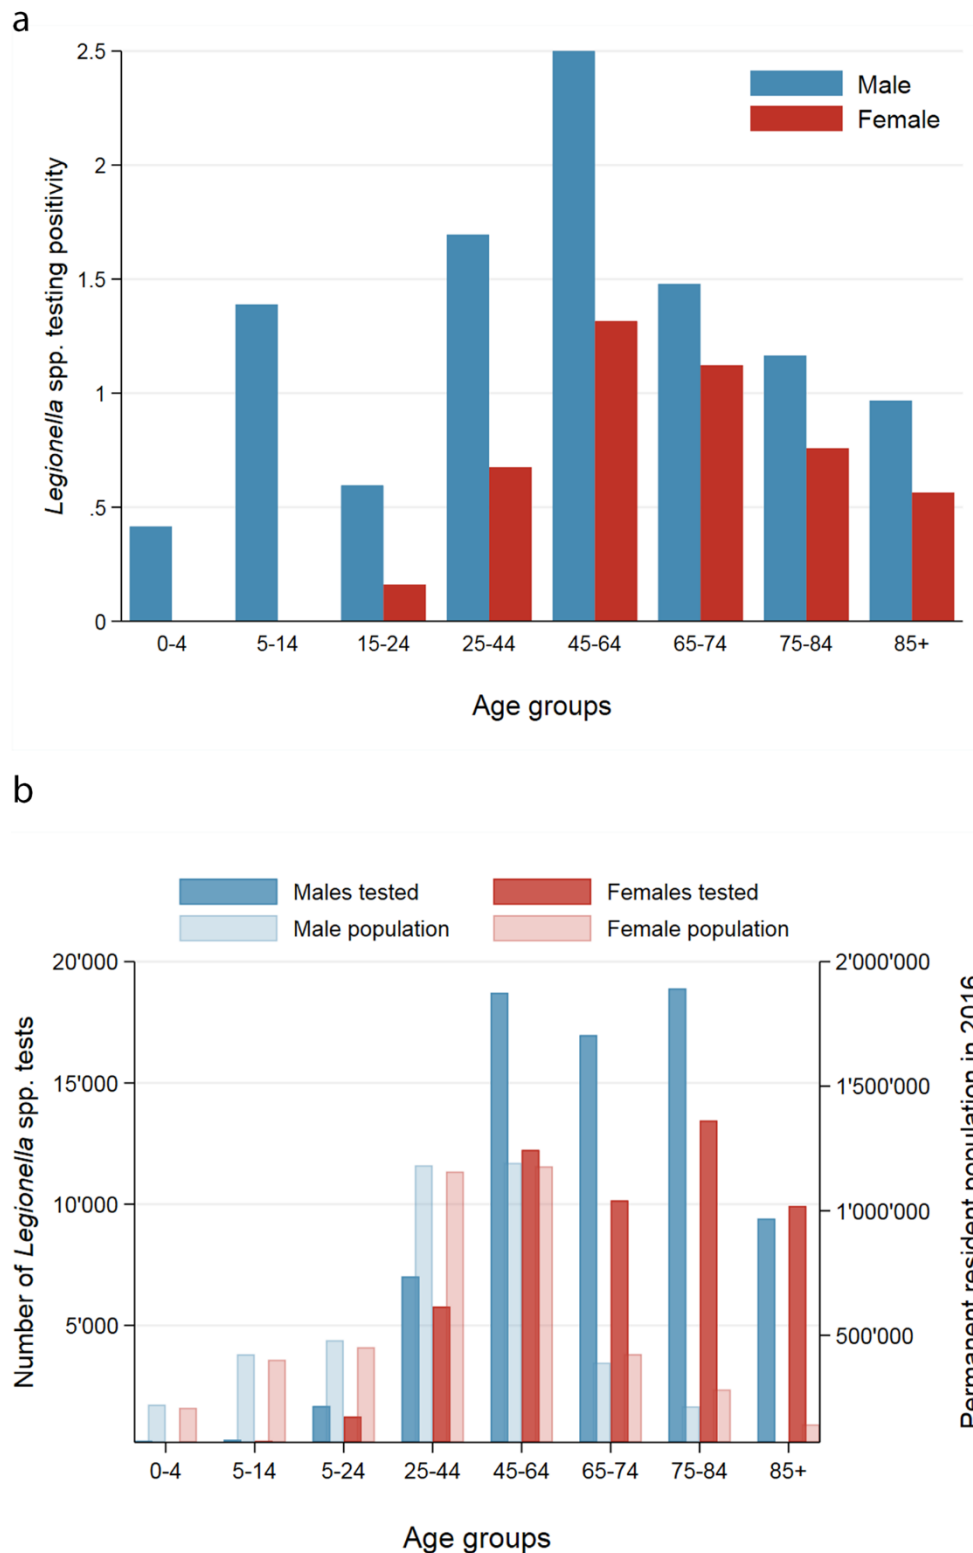

**Supplementary Figure 3** Age distribution in test volume and positivity (a) Positivity of *Legionella* spp. testing by sex and age groups, Switzerland, 2007-2016. (b) Number of *Legionella* spp. tests performed by sex and age groups in Switzerland (2007-2016) and permanent resident population in Switzerland (2016) by sex and age groups.

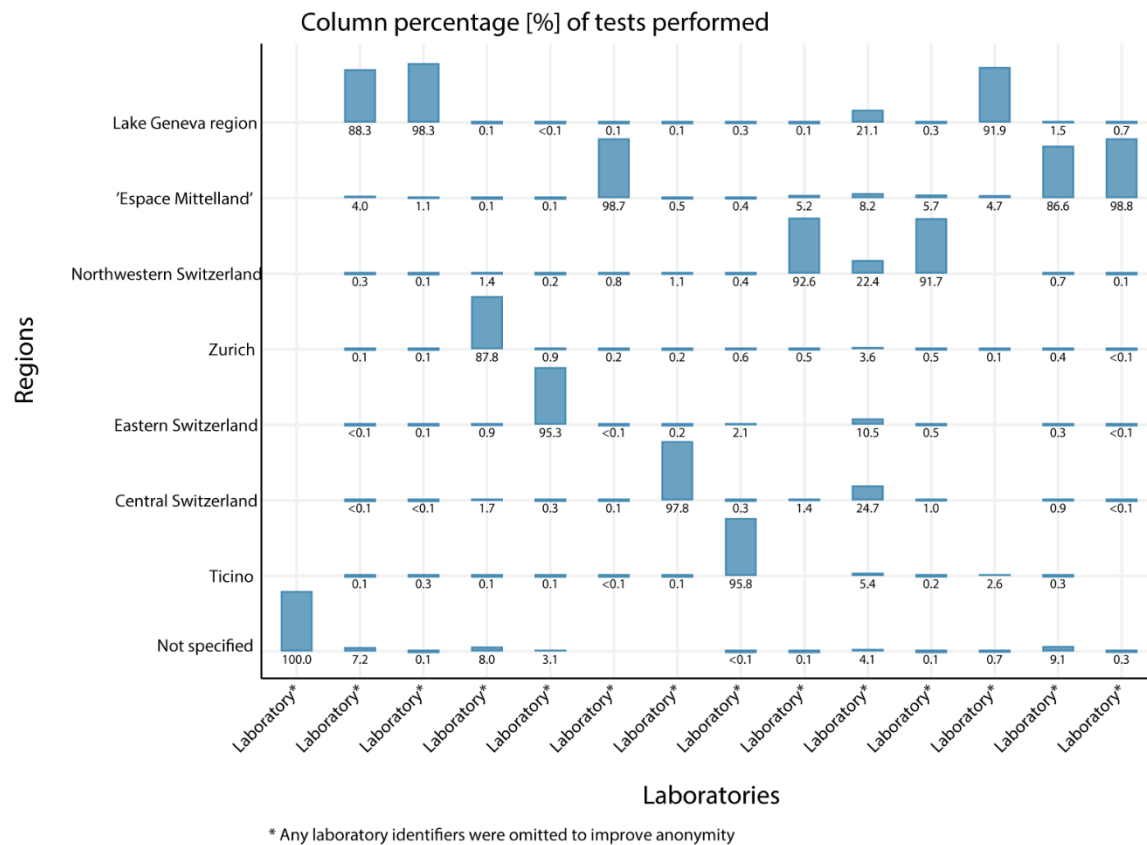

**Supplementary Figure 4** Correlation between the variables “greater region” and “laboratory” included in the *Legionella* spp. positivity study, Switzerland, 2007-2016.

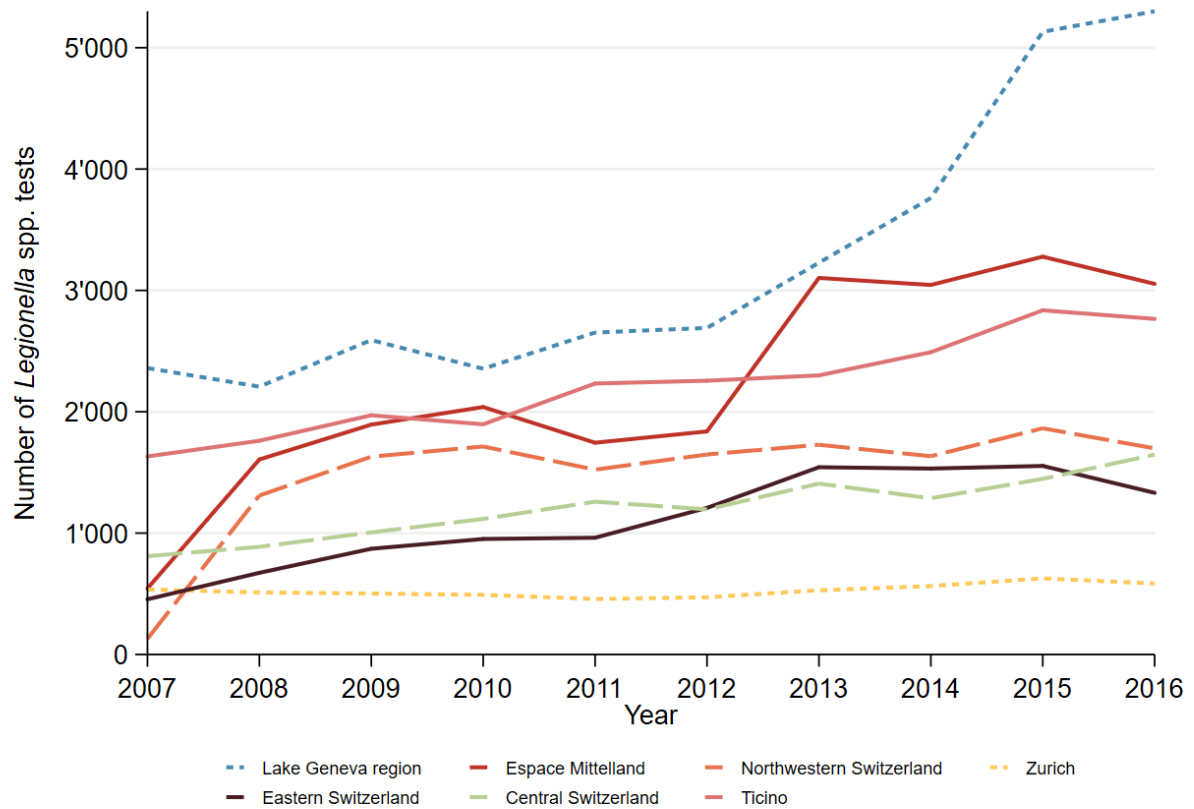

**Supplementary Figure 5** Trends of the total number of tests performed per greater region by 14 diagnostic laboratories included in the *Legionella* spp. positivity study, Switzerland, 2007-2016
